# Supplementary material for: Marked variations in gut microbiota and some innate immune responses of fresh water crayfish, marron (Cherax cainii, Austin 2002) fed dietary supplementation of Clostridium butyricum
Source: PeerJ. 2019 Aug 27;7:e7553. doi: 10.7717/peerj.7553 (PMC6716501; doi:10.7717/peerj.7553)
Supplement: Supplemental Information 2 [file peerj-07-7553-s002.xlsx]

## Sheet: Protein
Date	Product	Label	Weight (g)	Weight (mg)	Sample Titration (ml)	Blank Titration (ml) Approx. 0.2 - 0.3	%N (9.58%)	%CP
2018-08-02	EDTA		0.5415	541.5	36.8	0.1	9.49524	59.3452
	Control		0.2786	278.6	26.5	0.1	13.2758	82.9738
	Control		0.2667	266.7	25.7	0.1	13.4479	84.0495
	Control		0.2812	281.2	27.6	0.1	13.7011	85.6319
	Control		0.2725	272.5	26.5	0.1	13.573	84.8312					%CP = 14.01 x M x f x 100 x (mL HCL for titrant - mL HCL for BLANK) / Sample weight (mg)
							AVG	84.3716
							STDV	1.1339
							SE	0.566948
	Probiotic		0.2994	299.4	31	0.1	14.4592	90.3701					Where	14.01 =	the atomic weight of N
	Probiotic		0.2987	298.7	30.7	0.1	14.3524	89.7025						M =	the molarity of the Hydrochloric Acid
	Probiotic		0.2988	298.8	29.7	0.1	13.8787	86.742						f =	standard Kjeldahl factor (6.25)
	Probiotic		0.2988	298.8	30.1	0.1	14.0663	87.9142
							AVG	88.6822
							STDV	1.65775
							SE	0.828874
							P-Value	0.0264696

## Sheet: Energy
Energy calculation
Marron/Replicate	Feed	Energy (Mj)
1	Control	19921.8
2	Control	20186.4
3	Control	20053.2
4	Control	19993.7
	AVG	20038.8
	STD	112.125
	SE	56.0626
1	Probiotic	20142.9
2	Probiotic	20138.4
3	Probiotic	20504.5
4	Probiotic	20178.5
	AVG	20241.1
	STD	176.505
	SE	88.2526
	P-value	0.0710395

## Sheet: Fat
Fat
Marron/Replicate	Feed	Fat
1	Control	8.9
2	Control	9
3	Control	8.8
4	Control	8.6
	AVG	8.825
	STD	0.170783
	SE	0.0853913
1	Probiotic	8
2	Probiotic	8.9
3	Probiotic	8.2
4	Probiotic	8.5
	AVG	8.4
	STD	0.391578
	SE	0.195789
	P-value	0.0601709

## Sheet: HM
Hepatopancreas moisture
Marron/Replicate	Feed	HI
1	Control	38.8
2	Control	38.2
3	Control	37.8
4	Control	39.2
	AVG	38.5
	STD	0.621825
	SE	0.310913
1	Probiotic	37.6
2	Probiotic	37.2
3	Probiotic	37.8
4	Probiotic	36.8
	AVG	37.35
	STD	0.443471
	SE	0.221736
	P-value	0.050828

## Sheet: Lysozyme
Lysozyme
Marron/Replicate	Feed	Lysozyme (u/mL)
1	Control	0.42
2	Control	0.41
3	Control	0.43
4	Control	0.41
	AVG	0.4175
	STD	0.00957427
	SE	0.00478714
1	Probiotic	0.49
2	Probiotic	0.48
3	Probiotic	0.45
4	Probiotic	0.48
	AVG	0.475
	STD	0.0173205
	SE	0.00866025
	P-value	0.00965622

## Sheet: THC
Total haemocyte counts
THC
Treatment	Marron	Cell count-1	Cell count-2	Cell count-3	Final count	Dilution factor	Vol of grid	THC
Control	1	115	109	112	336	0.01	400	8.4
Control	2	105	109	108	322	0.01	400	8.05
Control	3	103	109	111	323	0.01	400	8.075
Control	4	117	107	110	334	0.01	400	8.35
							AVG	8.21875
							STD	0.18186
							SE	0.0909298
Probiotic	1	115	122	124	361	0.01	400	9.025
Probiotic	2	128	124	125	377	0.01	400	9.425
Probiotic	3	129	123	126	378	0.01	400	9.45
Probiotic	4	133	136	132	401	0.01	400	10.025
							AVG	9.48125
							STD	0.411489
							SE	0.205744
							P-value	0.00552205

## Sheet: HO
Hemolymph Osmolality
Marron/Replicate	Feed	HO
1	Control	0.42
2	Control	0.4
3	Control	0.41
4	Control	0.41
	AVG	0.41
	STD	0.00816497
	SE	0.00408248
1	Probiotic	0.42
2	Probiotic	0.42
3	Probiotic	0.44
4	Probiotic	0.47
	AVG	0.4375
	STD	0.0236291
	SE	0.0118145
	P-value	0.057586
