# Supplementary material for: Marked variations in gut microbiota and some innate immune responses of fresh water crayfish, marron (Cherax cainii, Austin 2002) fed dietary supplementation of Clostridium butyricum
Source: PeerJ. 2019 Aug 27;7:e7553. doi: 10.7717/peerj.7553 (PMC6716501; doi:10.7717/peerj.7553)
Supplement: Supplemental Information 3 [file peerj-07-7553-s003.xlsx]

## Sheet: Diversity_index
CON		PRO	T.test
1.61675		2.88695
1.50507	Shannon	3.20233	0.000620143
1.41127		3.2589
1.52495		3.39507
1.51451	AVG	3.18581
0.0842789	SD	0.215036
0.0421395	SE	0.107518
0.658906		0.752842
0.596659	Simpson	0.712877
0.696469		0.843441
0.788294		0.981577
0.685082	AVG	0.822684
0.0801792	SD	0.119183	0.00386859
0.0400896	SE	0.0595913
6.92384		15.1069
7.89225	Fisher_alpha	18.0824
7.61986		21.5294
7.93904		12.0853
7.59375	AVG	16.701
0.468256	SD	4.04424	0.0103994
0.234128	SE	2.02212
79.6		120
102.25	Chao1	131.6
76.3		151.125	0.0185501
88.82		111.2
86.7425	AVG	128.481
11.6169	SD	17.2534
5.80847	SE	8.6267
