# Supplementary material for: Marked variations in gut microbiota and some innate immune responses of fresh water crayfish, marron (Cherax cainii, Austin 2002) fed dietary supplementation of Clostridium butyricum
Source: PeerJ. 2019 Aug 27;7:e7553. doi: 10.7717/peerj.7553 (PMC6716501; doi:10.7717/peerj.7553)
Supplement: Supplemental Information 4 [file peerj-07-7553-s004.xlsx]

## Sheet: Sheet1
OTU						CON1	CON2	CON3	CON4	PRO1	PRO2	PRO3	PRO4			CON1	CON2	CON3	CON4	PRO1	PRO2	PRO3	PRO4
Archaea	Euryarchaeota	Methanobacteria	Methanobacteriales	Methanobacteriaceae	Methanobacterium	0	0	0	0	0	3	0	0	Methanobacterium	Methanobacterium	0	0	0	0	0	3	0	0
Bacteria	Acidobacteria	Blastocatellia	Not_Available	Not_Available	Stenotrophobacter	0	0	0	0	0	0	2	0	Stenotrophobacter	Stenotrophobacter	0	0	0	0	0	0	2	0
Bacteria	Actinobacteria	Acidimicrobiia	Acidimicrobiales	Acidimicrobiaceae	Ilumatobacter	0	0	0	0	1	5	42	0	Ilumatobacter	Ilumatobacter	0	0	0	0	1	5	42	0
Bacteria	Actinobacteria	Acidimicrobiia	Acidimicrobiales	Other	Other	0	0	0	0	0	0	7	0	Other	Other	2371	918	882	416	1496	3772	3737	92
Bacteria	Actinobacteria	Actinobacteria	Corynebacteriales	Mycobacteriaceae	Mycobacterium	0	0	0	0	0	0	9	0	Mycobacterium	Mycobacterium	0	0	0	0	0	0	9	0
Bacteria	Actinobacteria	Actinobacteria	Micrococcales	Not_Available	Timonella	0	0	0	13	0	0	0	0	Timonella	Timonella	0	0	0	13	0	0	0	0
Bacteria	Actinobacteria	Actinobacteria	Other	Other	Other	0	0	0	0	0	1	20	0	Other	Flavobacterium	0	0	0	94	0	0	3	3
Bacteria	Bacteroidetes	Flavobacteriia	Flavobacteriales	Flavobacteriaceae	Flavobacterium	0	0	0	94	0	0	3	3	Flavobacterium	Cyanobacterium	0	0	0	0	0	0	9	0
Bacteria	Chloroflexi	Caldilineae	Caldilineales	Caldilineaceae	Other	0	0	0	0	0	3	0	0	Other	Cyanobium	0	4	0	0	1	31	1	0
Bacteria	Cyanobacteria	Not_Available	Chroococcales	Cyanobacteriaceae	Cyanobacterium	0	0	0	0	0	0	9	0	Cyanobacterium	Clostridium	0	2	0	0	0	6	0	0
Bacteria	Cyanobacteria	Not_Available	Synechococcales	Synechococcaceae	Cyanobium	0	4	0	0	1	31	1	0	Cyanobium	Tyzzerella	4	3	0	4	4	4	0	0
Bacteria	Cyanobacteria	Not_Available	Synechococcales	Other	Other	0	1	0	0	2	5	0	0	Other	Hypnocyclicus	153	456	13	0	7625	4389	0	0
Bacteria	Cyanobacteria	Not_Available	Other	Other	Other	0	0	0	0	0	0	29	0	Other	Fimbriiglobus	0	0	0	0	0	0	48	0
Bacteria	Firmicutes	Clostridia	Clostridiales	Clostridiaceae	Clostridium	0	2	0	0	0	6	0	0	Clostridium	Gemmata	0	0	0	0	0	0	23	0
Bacteria	Firmicutes	Clostridia	Clostridiales	Lachnospiraceae	Tyzzerella	4	3	0	4	4	4	0	0	Tyzzerella	Zavarzinella	0	0	0	0	0	0	10	0
Bacteria	Firmicutes	Clostridia	Clostridiales	Ruminococcaceae	Other	0	0	0	0	2	47	0	0	Other	Singulisphaera	0	0	0	0	0	0	11	0
Bacteria	Fusobacteria	Fusobacteriia	Fusobacteriales	Fusobacteriaceae	Hypnocyclicus	153	456	13	0	7625	4389	0	0	Hypnocyclicus	Bythopirellula	0	0	0	0	0	0	52	0
Bacteria	Planctomycetes	Planctomycetia	Planctomycetales	Gemmataceae	Fimbriiglobus	0	0	0	0	0	0	48	0	Fimbriiglobus	Planctopirus	0	0	0	0	0	0	33	0
Bacteria	Planctomycetes	Planctomycetia	Planctomycetales	Gemmataceae	Gemmata	0	0	0	0	0	0	23	0	Gemmata	Schlesneria	0	0	0	0	0	0	2	0
Bacteria	Planctomycetes	Planctomycetia	Planctomycetales	Gemmataceae	Zavarzinella	0	0	0	0	0	0	10	0	Zavarzinella	Thermostilla	0	0	0	0	0	0	24	0
Bacteria	Planctomycetes	Planctomycetia	Planctomycetales	Isosphaeraceae	Singulisphaera	0	0	0	0	0	0	11	0	Singulisphaera	Phreatobacter	0	0	0	0	0	0	5	0
Bacteria	Planctomycetes	Planctomycetia	Planctomycetales	Isosphaeraceae	Other	0	0	0	0	0	0	2	0	Other	Bosea	0	0	0	0	0	0	10	0
Bacteria	Planctomycetes	Planctomycetia	Planctomycetales	Planctomycetaceae	Bythopirellula	0	0	0	0	0	0	52	0	Bythopirellula	Hyphomicrobium	0	0	0	0	0	1	13	0
Bacteria	Planctomycetes	Planctomycetia	Planctomycetales	Planctomycetaceae	Planctopirus	0	0	0	0	0	0	33	0	Planctopirus	Alsobacter	1	0	0	0	1	2	7	0
Bacteria	Planctomycetes	Planctomycetia	Planctomycetales	Planctomycetaceae	Schlesneria	0	0	0	0	0	0	2	0	Schlesneria	Aquamicrobium	0	0	0	0	0	0	3	0
Bacteria	Planctomycetes	Planctomycetia	Planctomycetales	Planctomycetaceae	Thermostilla	0	0	0	0	0	0	24	0	Thermostilla	Nitratireductor	0	0	0	0	0	0	48	0
Bacteria	Planctomycetes	Planctomycetia	Planctomycetales	Planctomycetaceae	Other	0	0	0	0	0	0	6	0	Other	Rhodoligotrophos	0	0	0	0	0	1	46	0
Bacteria	Proteobacteria	Alphaproteobacteria	Not_Available	Not_Available	Phreatobacter	0	0	0	0	0	0	5	0	Phreatobacter	Gemmobacter	0	1	0	0	0	2	7	0
Bacteria	Proteobacteria	Alphaproteobacteria	Rhizobiales	Bradyrhizobiaceae	Bosea	0	0	0	0	0	0	10	0	Bosea	Paracoccus	0	0	0	0	0	4	61	0
Bacteria	Proteobacteria	Alphaproteobacteria	Rhizobiales	Bradyrhizobiaceae	Other	0	0	0	0	0	0	12	0	Other	Rhodobacter	0	1	0	0	0	2	53	0
Bacteria	Proteobacteria	Alphaproteobacteria	Rhizobiales	Hyphomicrobiaceae	Hyphomicrobium	0	0	0	0	0	1	13	0	Hyphomicrobium	Roseomonas	0	0	0	0	0	1	35	0
Bacteria	Proteobacteria	Alphaproteobacteria	Rhizobiales	Hyphomicrobiaceae	Other	0	0	0	0	0	0	3	0	Other	Geminicoccus	0	0	0	0	0	0	41	0
Bacteria	Proteobacteria	Alphaproteobacteria	Rhizobiales	Not_Available	Alsobacter	1	0	0	0	1	2	7	0	Alsobacter	Reyranella	0	1	0	0	0	0	5	0
Bacteria	Proteobacteria	Alphaproteobacteria	Rhizobiales	Phyllobacteriaceae	Aquamicrobium	0	0	0	0	0	0	3	0	Aquamicrobium	Polymorphobacter	0	0	0	0	0	0	51	0
Bacteria	Proteobacteria	Alphaproteobacteria	Rhizobiales	Phyllobacteriaceae	Nitratireductor	0	0	0	0	0	0	48	0	Nitratireductor	Sphingomonas	0	0	17	0	0	0	0	0
Bacteria	Proteobacteria	Alphaproteobacteria	Rhizobiales	Rhodobiaceae	Rhodoligotrophos	0	0	0	0	0	1	46	0	Rhodoligotrophos	Deefgea	0	3	0	14	0	0	1	0
Bacteria	Proteobacteria	Alphaproteobacteria	Rhizobiales	Other	Other	0	0	0	0	0	0	98	0	Other	Desulfovibrio	0	0	0	0	0	0	23	0
Bacteria	Proteobacteria	Alphaproteobacteria	Rhodobacterales	Rhodobacteraceae	Gemmobacter	0	1	0	0	0	2	7	0	Gemmobacter	Helicobacter	0	0	0	0	0	0	0	3
Bacteria	Proteobacteria	Alphaproteobacteria	Rhodobacterales	Rhodobacteraceae	Paracoccus	0	0	0	0	0	4	61	0	Paracoccus	Aeromonas	1133	5873	1533	1285	28	214	5	1779
Bacteria	Proteobacteria	Alphaproteobacteria	Rhodobacterales	Rhodobacteraceae	Rhodobacter	0	1	0	0	0	2	53	0	Rhodobacter	Pseudaeromonas	0	33	0	0	0	0	0	0
Bacteria	Proteobacteria	Alphaproteobacteria	Rhodobacterales	Rhodobacteraceae	Other	0	0	0	0	0	7	425	0	Other	Shewanella	0	23	2	97	0	0	0	2
Bacteria	Proteobacteria	Alphaproteobacteria	Rhodospirillales	Acetobacteraceae	Roseomonas	0	0	0	0	0	1	35	0	Roseomonas	Marimicrobium	0	0	0	0	0	0	53	0
Bacteria	Proteobacteria	Alphaproteobacteria	Rhodospirillales	Acetobacteraceae	Other	0	0	0	0	0	0	10	0	Other	Citrobacter	92	180	259	692	89	15	0	817
Bacteria	Proteobacteria	Alphaproteobacteria	Rhodospirillales	Geminicoccaceae	Geminicoccus	0	0	0	0	0	0	41	0	Geminicoccus	Raoultella	3	11	16	2150	3	1	3	1726
Bacteria	Proteobacteria	Alphaproteobacteria	Rhodospirillales	Not_Available	Reyranella	0	1	0	0	0	0	5	0	Reyranella	Plesiomonas	9	0	1	0	0	0	0	0
Bacteria	Proteobacteria	Alphaproteobacteria	Rhodospirillales	Rhodospirillaceae	Other	0	0	0	0	0	2	14	0	Other	Aquicella	0	0	0	0	0	0	8	0
Bacteria	Proteobacteria	Alphaproteobacteria	Sphingomonadales	Sphingomonadaceae	Polymorphobacter	0	0	0	0	0	0	51	0	Polymorphobacter	Methylococcus	0	0	0	0	1	4	0	0
Bacteria	Proteobacteria	Alphaproteobacteria	Sphingomonadales	Sphingomonadaceae	Sphingomonas	0	0	17	0	0	0	0	0	Sphingomonas	Pseudomonas	1	1	5	33	0	1	1	186
Bacteria	Proteobacteria	Alphaproteobacteria	Sphingomonadales	Sphingomonadaceae	Other	0	0	0	0	0	0	4	0	Other	Vibrio	4324	716	1450	149	1710	987	0	32
Bacteria	Proteobacteria	Alphaproteobacteria	Other	Other	Other	0	0	0	0	0	0	39	0	Other	Arenimonas	5	0	0	0	0	0	258	0
Bacteria	Proteobacteria	Betaproteobacteria	Burkholderiales	Burkholderiaceae	Other	0	0	0	0	0	0	36	0	Other	Oligoflexus	0	0	0	0	0	0	4	0
Bacteria	Proteobacteria	Betaproteobacteria	Burkholderiales	Not_Available	Other	0	0	0	0	0	0	11	0	Other	Terrimicrobium	0	0	0	0	0	0	2	0
Bacteria	Proteobacteria	Betaproteobacteria	Burkholderiales	Other	Other	0	0	0	0	0	0	237	0	Other	Luteolibacter	0	0	0	0	0	0	108	0
Bacteria	Proteobacteria	Betaproteobacteria	Neisseriales	Chromobacteriaceae	Deefgea	0	3	0	14	0	0	1	0	Deefgea
Bacteria	Proteobacteria	Betaproteobacteria	Rhodocyclales	Zoogloeaceae	Other	0	0	0	0	0	0	13	0	Other
Bacteria	Proteobacteria	Betaproteobacteria	Other	Other	Other	0	0	0	0	0	0	41	0	Other
Bacteria	Proteobacteria	Deltaproteobacteria	Desulfovibrionales	Desulfovibrionaceae	Desulfovibrio	0	0	0	0	0	0	23	0	Desulfovibrio
Bacteria	Proteobacteria	Epsilonproteobacteria	Campylobacterales	Helicobacteraceae	Helicobacter	0	0	0	0	0	0	0	3	Helicobacter
Bacteria	Proteobacteria	Gammaproteobacteria	Aeromonadales	Aeromonadaceae	Aeromonas	1133	5873	1533	1285	28	214	5	1779	Aeromonas
Bacteria	Proteobacteria	Gammaproteobacteria	Aeromonadales	Aeromonadaceae	Pseudaeromonas	0	33	0	0	0	0	0	0	Pseudaeromonas
Bacteria	Proteobacteria	Gammaproteobacteria	Aeromonadales	Aeromonadaceae	Other	1	155	0	0	0	0	0	0	Other
Bacteria	Proteobacteria	Gammaproteobacteria	Alteromonadales	Shewanellaceae	Shewanella	0	23	2	97	0	0	0	2	Shewanella
Bacteria	Proteobacteria	Gammaproteobacteria	Cellvibrionales	Halieaceae	Marimicrobium	0	0	0	0	0	0	53	0	Marimicrobium
Bacteria	Proteobacteria	Gammaproteobacteria	Cellvibrionales	Halieaceae	Other	0	0	0	0	0	0	54	0	Other
Bacteria	Proteobacteria	Gammaproteobacteria	Enterobacterales	Enterobacteriaceae	Citrobacter	92	180	259	692	89	15	0	817	Citrobacter
Bacteria	Proteobacteria	Gammaproteobacteria	Enterobacterales	Enterobacteriaceae	Raoultella	3	11	16	2150	3	1	3	1726	Raoultella
Bacteria	Proteobacteria	Gammaproteobacteria	Enterobacterales	Enterobacteriaceae	Other	4	2	0	1	0	0	0	0	Other
Bacteria	Proteobacteria	Gammaproteobacteria	Enterobacterales	Hafniaceae	Other	0	0	0	101	215	15	143	5	Other
Bacteria	Proteobacteria	Gammaproteobacteria	Enterobacterales	Not_Available	Plesiomonas	9	0	1	0	0	0	0	0	Plesiomonas
Bacteria	Proteobacteria	Gammaproteobacteria	Enterobacterales	Other	Other	32	48	1	118	3	0	0	44	Other
Bacteria	Proteobacteria	Gammaproteobacteria	Legionellales	Coxiellaceae	Aquicella	0	0	0	0	0	0	8	0	Aquicella
Bacteria	Proteobacteria	Gammaproteobacteria	Methylococcales	Methylococcaceae	Methylococcus	0	0	0	0	1	4	0	0	Methylococcus
Bacteria	Proteobacteria	Gammaproteobacteria	Nevskiales	Sinobacteraceae	Other	0	0	0	0	0	0	97	0	Other
Bacteria	Proteobacteria	Gammaproteobacteria	Pseudomonadales	Pseudomonadaceae	Pseudomonas	1	1	5	33	0	1	1	186	Pseudomonas
Bacteria	Proteobacteria	Gammaproteobacteria	Other	Other	Other	0	0	0	0	0	0	32	0	Other
Bacteria	Proteobacteria	Gammaproteobacteria	Vibrionales	Vibrionaceae	Vibrio	4324	716	1450	149	1710	987	0	32	Vibrio
Bacteria	Proteobacteria	Gammaproteobacteria	Xanthomonadales	Xanthomonadaceae	Arenimonas	5	0	0	0	0	0	258	0	Arenimonas
Bacteria	Proteobacteria	Oligoflexia	Oligoflexales	Oligoflexaceae	Oligoflexus	0	0	0	0	0	0	4	0	Oligoflexus
Bacteria	Other	Other	Other	Other	Other	0	0	0	0	678	3120	0	0	Other
Bacteria	Verrucomicrobia	Spartobacteria	Not_Available	Not_Available	Terrimicrobium	0	0	0	0	0	0	2	0	Terrimicrobium
Bacteria	Verrucomicrobia	Verrucomicrobiae	Verrucomicrobiales	Verrucomicrobiaceae	Luteolibacter	0	0	0	0	0	0	108	0	Luteolibacter
Other	Other	Other	Other	Other	Other	2334	712	881	196	596	572	2404	43	Other
						CON	PRO		CON	PRO		CON	PRO
					Methanobacterium	0	3	Methanobacterium	0	0.000144203	Methanobacterium	0	0.0144203
					Stenotrophobacter	0	2	Stenotrophobacter	0	9.61354e-05	Stenotrophobacter	0	0.00961354
					Ilumatobacter	0	48	Ilumatobacter	0	0.00230725	Ilumatobacter	0	0.230725
					Mycobacterium	0	9	Mycobacterium	0	0.000432609	Mycobacterium	0	0.0432609
					Timonella	13	0	Timonella	0.000623202	0	Timonella	0.0623202	0
					Flavobacterium	94	6	Flavobacterium	0.00450623	0.000288406	Flavobacterium	0.450623	0.0288406
					Cyanobacterium	0	9	Cyanobacterium	0	0.000432609	Cyanobacterium	0	0.0432609
					Cyanobium	4	33	Cyanobium	0.000191755	0.00158623	Cyanobium	0.0191755	0.158623
					Clostridium	2	6	Clostridium	9.58773e-05	0.000288406	Clostridium	0.00958773	0.0288406
					Tyzzerella	11	8	Tyzzerella	0.000527325	0.000384541	Tyzzerella	0.0527325	0.0384541
					Hypnocyclicus	622	12014	Hypnocyclicus	0.0298178	0.577485	Hypnocyclicus	2.98178	57.7485
					Fimbriiglobus	0	48	Fimbriiglobus	0	0.00230725	Fimbriiglobus	0	0.230725
					Gemmata	0	23	Gemmata	0	0.00110556	Gemmata	0	0.110556
					Zavarzinella	0	10	Zavarzinella	0	0.000480677	Zavarzinella	0	0.0480677
					Singulisphaera	0	11	Singulisphaera	0	0.000528744	Singulisphaera	0	0.0528744
					Bythopirellula	0	52	Bythopirellula	0	0.00249952	Bythopirellula	0	0.249952
					Planctopirus	0	33	Planctopirus	0	0.00158623	Planctopirus	0	0.158623
					Schlesneria	0	2	Schlesneria	0	9.61354e-05	Schlesneria	0	0.00961354
					Thermostilla	0	24	Thermostilla	0	0.00115362	Thermostilla	0	0.115362
					Phreatobacter	0	5	Phreatobacter	0	0.000240338	Phreatobacter	0	0.0240338
					Bosea	0	10	Bosea	0	0.000480677	Bosea	0	0.0480677
					Hyphomicrobium	0	14	Hyphomicrobium	0	0.000672948	Hyphomicrobium	0	0.0672948
					Alsobacter	1	10	Alsobacter	4.79386e-05	0.000480677	Alsobacter	0.00479386	0.0480677
					Aquamicrobium	0	3	Aquamicrobium	0	0.000144203	Aquamicrobium	0	0.0144203
					Nitratireductor	0	48	Nitratireductor	0	0.00230725	Nitratireductor	0	0.230725
					Rhodoligotrophos	0	47	Rhodoligotrophos	0	0.00225918	Rhodoligotrophos	0	0.225918
					Gemmobacter	1	9	Gemmobacter	4.79386e-05	0.000432609	Gemmobacter	0.00479386	0.0432609
					Paracoccus	0	65	Paracoccus	0	0.0031244	Paracoccus	0	0.31244
					Rhodobacter	1	55	Rhodobacter	4.79386e-05	0.00264372	Rhodobacter	0.00479386	0.264372
					Roseomonas	0	36	Roseomonas	0	0.00173044	Roseomonas	0	0.173044
					Geminicoccus	0	41	Geminicoccus	0	0.00197077	Geminicoccus	0	0.197077
					Reyranella	1	5	Reyranella	4.79386e-05	0.000240338	Reyranella	0.00479386	0.0240338
					Polymorphobacter	0	51	Polymorphobacter	0	0.00245145	Polymorphobacter	0	0.245145
					Sphingomonas	17	0	Sphingomonas	0.000814957	0	Sphingomonas	0.0814957	0
					Deefgea	17	1	Deefgea	0.000814957	4.80677e-05	Deefgea	0.0814957	0.00480677
					Desulfovibrio	0	23	Desulfovibrio	0	0.00110556	Desulfovibrio	0	0.110556
					Helicobacter	0	3	Helicobacter	0	0.000144203	Helicobacter	0	0.0144203
					Aeromonas	9824	2026	Aeromonas	0.470949	0.0973851	Aeromonas	47.0949	9.73851
					Pseudaeromonas	33	0	Pseudaeromonas	0.00158198	0	Pseudaeromonas	0.158198	0
					Shewanella	122	2	Shewanella	0.00584851	9.61354e-05	Shewanella	0.584851	0.00961354
					Marimicrobium	0	53	Marimicrobium	0	0.00254759	Marimicrobium	0	0.254759
					Citrobacter	1223	921	Citrobacter	0.058629	0.0442703	Citrobacter	5.8629	4.42703
					Raoultella	2180	1733	Raoultella	0.104506	0.0833013	Raoultella	10.4506	8.33013
					Plesiomonas	10	0	Plesiomonas	0.000479386	0	Plesiomonas	0.0479386	0
					Aquicella	0	8	Aquicella	0	0.000384541	Aquicella	0	0.0384541
					Methylococcus	0	5	Methylococcus	0	0.000240338	Methylococcus	0	0.0240338
					Pseudomonas	40	188	Pseudomonas	0.00191755	0.00903672	Pseudomonas	0.191755	0.903672
					Vibrio	6639	2729	Vibrio	0.318265	0.131177	Vibrio	31.8265	13.1177
					Arenimonas	5	258	Arenimonas	0.000239693	0.0124015	Arenimonas	0.0239693	1.24015
					Oligoflexus	0	4	Oligoflexus	0	0.000192271	Oligoflexus	0	0.0192271
					Terrimicrobium	0	2	Terrimicrobium	0	9.61354e-05	Terrimicrobium	0	0.00961354
					Luteolibacter	0	108	Luteolibacter	0	0.00519131	Luteolibacter	0	0.519131
						20860	20804

## Sheet: Sheet2
	Control	Probiotic
Flavobacterium	0.450623	0.0288406
Cyanobium	0.0191755	0.158623
Clostridium	0.00958773	0.0288406
Hypnocyclicus	2.98178	57.7485
Rhodobacter	0.00479386	0.264372
Aeromonas	47.0949	9.73851
Shewanella	0.584851	0.00961354
Citrobacter	5.8629	4.42703
Raoultella	10.4506	8.33013
Pseudomonas	0.191755	0.903672
Vibrio	31.8265	13.1177
Arenimonas	0.0239693	1.24015
